# Supplementary material for: Spatial Clustering by Red Deer and Its Relevance for Management of Chronic Wasting Disease
Source: MDPI journal article supplement (doi:10.3390/ani11051272), 2021-04-28
Supplement: s1 [file s1]

## Supplementary Materials

**Table S1.** Model selection results using the Akaike Information Criterion (AIC) for all years (2017-19). Models compared were generalized linear mixed effects models with individual ID as random term and candidate fixed effects as listed. The response variable of the candidate models is shown in bold.  $\Delta$ AIC is AIC relative to best model.

| Year                      | Season | Season x year | AIC      | $\Delta$ AIC |
|---------------------------|--------|---------------|----------|--------------|
| <b>Elevation</b>          |        |               |          |              |
| 1                         |        |               | 540403.3 | 27451.2      |
|                           | 1      |               | 515088   | 2135.9       |
| 1                         | 1      |               | 514002.8 | 1050.7       |
| 1                         | 1      | 1             | 512952.1 | 0            |
| <b>Agriculture</b>        |        |               |          |              |
| 1                         |        |               | 29894    | 3968.6       |
|                           | 1      |               | 27208    | 1278.5       |
| 1                         | 1      |               | 26129    | 199.5        |
| 1                         | 1      | 1             | 25929.5  | 0            |
| <b>Number of clusters</b> |        |               |          |              |
| 1                         |        |               | 482778.8 | 3896.2       |
|                           | 1      |               | 486022.7 | 7140.1       |
| 1                         | 1      |               | 480396.1 | 1486.5       |
| 1                         | 1      | 1             | 478882.6 | 0            |

**Table S2.** Parameter estimates for generalized linear mixed effects models analysing elevation, habitat (forest vs. agricultural habitat), and number of clusters per individual for red deer in Lærdal, Norway 2017-19. Baseline for season and year was fall 2017. Individual ID is fitted as a random intercept with std. dev. = 143.5, 0.8742 and 67.89 respectively for elevation, habitat and cluster number.

| Parameter                 | Estimate | SE     | Lower 95% limit | Upper 95% limit |
|---------------------------|----------|--------|-----------------|-----------------|
| <b>Elevation</b>          |          |        |                 |                 |
| Intercept                 | 522.748  | 40.180 | 443.995         | 601.501         |
| Fall 2018                 | 181.574  | 6.263  | 169.299         | 193.849         |
| Spring 2017               | 6.372    | 12.081 | -17.307         | 30.051          |
| Spring 2018               | 5.490    | 8.264  | -10.707         | 21.687          |
| Spring 2019               | -4.500   | 11.247 | -26.544         | 17.544          |
| Summer 2017               | 269.755  | 8.435  | 253.222         | 286.288         |
| Summer 2018               | 312.498  | 6.543  | 299.674         | 325.322         |
| Winter 2017               | -159.866 | 10.759 | -180.954        | -138.778        |
| Winter 2018               | -174.907 | 6.127  | -186.916        | -162.898        |
| Winter 2019               | -105.851 | 6.607  | -118.801        | -92.901         |
| <b>Habitat</b>            |          |        |                 |                 |
| Intercept                 | 1.388    | 0.256  | 0.886           | 1.890           |
| Fall 2018                 | 1.137    | 0.105  | 0.931           | 1.343           |
| Spring 2017               | -0.345   | 0.167  | -0.673          | -0.018          |
| Spring 2018               | 0.534    | 0.140  | 0.260           | 0.808           |
| Spring 2019               | 1.011    | 0.224  | 0.572           | 1.449           |
| Summer 2017               | 2.449    | 0.280  | 1.900           | 2.999           |
| Summer 2018               | 1.968    | 0.138  | 1.697           | 2.239           |
| Winter 2017               | -1.338   | 0.138  | -1.608          | -1.068          |
| Winter 2018               | -0.495   | 0.088  | -0.668          | -0.322          |
| Winter 2019               | 0.289    | 0.104  | 0.085           | 0.492           |
| <b>Number of clusters</b> |          |        |                 |                 |
| Intercept                 | 191.185  | 18.955 | 154.033         | 228.337         |
| Fall 2018                 | 25.560   | 2.445  | 20.768          | 30.352          |
| Spring 2017               | -96.332  | 5.101  | -106.330        | -86.334         |
| Spring 2018               | 66.922   | 3.147  | 60.754          | 73.090          |
| Spring 2019               | -94.674  | 4.675  | -103.837        | -85.511         |
| Summer 2017               | -61.224  | 3.394  | -67.876         | -54.572         |
| Summer 2018               | 13.175   | 2.573  | 8.132           | 18.218          |
| Winter 2017               | -39.703  | 4.455  | -48.435         | -30.971         |
| Winter 2018               | 139.396  | 2.299  | 134.890         | 143.902         |
| Winter 2019               | 8.661    | 2.593  | 3.579           | 13.743          |

**Table S3.** Model selection results using the Akaike Information Criterion for subset of winter months (January-March) related to snow depth (2018-19). Models compared were generalized linear mixed effects models with individual ID as random term and candidate fixed effects as listed. The response variable of the candidate models is shown in bold.

|                           | Year | Snow depth | Snow depth x year | AIC      | ΔAIC   |
|---------------------------|------|------------|-------------------|----------|--------|
| <b>Elevation</b>          |      |            |                   |          |        |
|                           | 1    |            |                   | 48617.0  | 109.1  |
|                           |      | 1          |                   | 49431.1  | 923.2  |
|                           | 1    | 1          |                   | 48538.9  | 31.1   |
|                           | 1    | 1          | 1                 | 48507.8  | 0      |
| <b>Agriculture</b>        |      |            |                   |          |        |
|                           | 1    |            |                   | 3813.4   | 20.1   |
|                           |      | 1          |                   | 3908.2   | 114.8  |
|                           | 1    | 1          |                   | 3793.4   | 0      |
|                           | 1    | 1          | 1                 | 3795.0   | 1.6    |
| <b>Number of clusters</b> |      |            |                   |          |        |
|                           | 1    |            |                   | 145680.8 | 1484.1 |
|                           |      | 1          |                   | 146321.6 | 2124.9 |
|                           | 1    | 1          |                   | 144323.1 | 126.4  |
|                           | 1    | 1          | 1                 | 144196.7 | 0      |

**Table S4.** Parameter estimates for generalized linear mixed effects models analysing the effect of snow depth (in mm and scaled) on use of elevation, habitat (forest vs. agricultural habitat), and number of clusters per individual for red deer during winter in Lærdal, Norway 2018-19. Baseline for year was 2018. Individual ID is fitted as a random intercept with std. dev. = 177.9, 1.091 and 82.04 respectively for elevation, habitat and cluster number.

| Parameter                 | Estimate | SE    | Lower 95% limit | Upper 95% limit |
|---------------------------|----------|-------|-----------------|-----------------|
| <b>Elevation</b>          |          |       |                 |                 |
| Intercept                 | 324.35   | 49.40 | 227.52          | 421.17          |
| Year 2019                 | 100.31   | 3.14  | 94.15           | 106.46          |
| Snow depth                | 9.96     | 2.03  | 5.98            | 13.93           |
| Snow depth x Year 2019    | 20.12    | 3.76  | 12.75           | 27.48           |
| <b>Habitat</b>            |          |       |                 |                 |
| Intercept                 | 0.835    | 0.311 | 0.226           | 1.444           |
| Year 2019                 | 1.125    | 0.106 | 0.917           | 1.333           |
| Snow depth                | 0.286    | 0.062 | 0.165           | 0.407           |
| <b>Number of clusters</b> |          |       |                 |                 |
| Intercept                 | 321.70   | 22.79 | 277.03          | 366.37          |
| Year 2019                 | -101.13  | 2.11  | -105.27         | -96.99          |
| Snow depth                | 48.27    | 1.24  | 45.84           | 50.70           |
| Snow depth x Year 2019    | -28.28   | 2.53  | -33.23          | -23.33          |

**Table S5.** Model selection results using the Akaike Information Criterion for all years (2017-19) for the response variable “number of revisits”. Models compared were generalized linear mixed effects models with individual ID as random term and candidate fixed effects as listed. The “season x year” interaction term was a dummy variable due to no data from summer and fall 2019 (see methods), and therefore only habitat interaction with “season x year” was run.

|      |        |               |         |                     | AIC      | ΔAIC   |
|------|--------|---------------|---------|---------------------|----------|--------|
| Year | Season | Season x year | Habitat | Habitat:season:year |          |        |
| 1    |        |               |         |                     | 251740.0 | 8747.1 |
| 1    | 1      |               |         |                     | 245677.1 | 2684.0 |
| 1    | 1      | 1             |         |                     | 245199.8 | 2206.7 |
| 1    | 1      | 1             | 1       |                     | 244399.1 | 1406.0 |
| 1    | 1      | 1             | 1       | 1                   | 242993.1 | 0      |

**Table S6.** Parameter estimates for a generalized linear mixed effects model analysing number of revisits per cluster for red deer in Lærdal, Norway 2017-19. Baseline for season and year was fall 2017. Individual ID is fitted as a random intercept with std. dev = 0.1913.

| Parameter                        | Estimate | SE    | Lower<br>95%<br>limit | Upper<br>95%<br>limit |
|----------------------------------|----------|-------|-----------------------|-----------------------|
| Intercept                        | 2.033    | 0.060 | 1.915                 | 2.151                 |
| Fall 2018                        | -0.057   | 0.038 | -0.132                | 0.018                 |
| Spring 2017                      | -0.477   | 0.065 | -0.604                | -0.351                |
| Spring 2018                      | -0.176   | 0.050 | -0.275                | -0.077                |
| Spring 2019                      | -0.227   | 0.095 | -0.413                | -0.042                |
| Summer 2017                      | -0.231   | 0.127 | -0.480                | 0.018                 |
| Summer 2018                      | -0.117   | 0.054 | -0.222                | -0.011                |
| Winter 2017                      | -0.007   | 0.044 | -0.093                | 0.079                 |
| Winter 2018                      | 1.135    | 0.030 | 1.076                 | 1.193                 |
| Winter 2019                      | 0.298    | 0.035 | 0.230                 | 0.367                 |
| Habitat (forest vs. agriculture) | -0.146   | 0.031 | -0.207                | -0.085                |
| Habitat x Fall 2018              | 0.260    | 0.041 | 0.180                 | 0.341                 |
| Habitat x Spring 2017            | 0.591    | 0.074 | 0.446                 | 0.737                 |
| Habitat x Spring 2018            | 0.802    | 0.054 | 0.696                 | 0.908                 |
| Habitat x Spring 2019            | 0.234    | 0.099 | 0.040                 | 0.428                 |
| Habitat x Summer 2017            | 0.190    | 0.129 | -0.063                | 0.442                 |
| Habitat x Summer 2018            | 0.422    | 0.056 | 0.312                 | 0.532                 |
| Habitat x Winter 2017            | 0.172    | 0.059 | 0.057                 | 0.288                 |
| Habitat x Winter 2018            | -0.386   | 0.034 | -0.452                | -0.320                |
| Habitat x Winter 2019            | 0.056    | 0.038 | -0.019                | 0.130                 |
